# Supplementary material for: Effect of Novel AKT Inhibitor Vevorisertib as Single Agent and in Combination with Sorafenib on Hepatocellular Carcinoma in a Cirrhotic Rat Model
Source: MDPI journal article supplement (doi:10.3390/ijms232416206), 2022-12-19
Supplement: s1 [file s1]

## Supplementary information:

# Effect of novel AKT inhibitor Vevorisertib as single agent and in combination with Sorafenib on hepatocellular carcinoma in a cirrhotic rat model

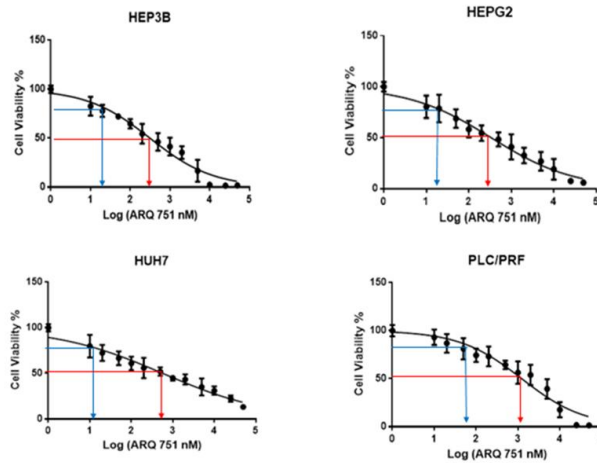

**Supplementary Figure S1: Cell viability assay on cell lines.** MTT assay was used to determine viability of Hep3B, HepG2, HuH7, PLC/PRF cells treated with different concentrations of Sorafenib or ARQ 751(vevorisertib) incubated during 48 hours. All experiments were done in triplicates and repeated three times. IC<sub>20</sub> blue line, IC<sub>50</sub> red line. Data are presented as mean  $\pm$  SD.

|                                |                                                            | HEP3B            | HUH7             | HEPG2              | PLC/PRF/5        |
|--------------------------------|------------------------------------------------------------|------------------|------------------|--------------------|------------------|
| Vevorisertib                   | IC <sub>20</sub>                                           | 0.02 $\pm$ 0.002 | 0.01 $\pm$ 0.001 | 0.003 $\pm$ 0.0003 | 0.04 $\pm$ 0.009 |
|                                | IC <sub>50</sub>                                           | 0.32 $\pm$ 0.05  | 0.58 $\pm$ 0.05  | 0.34 $\pm$ 0.02    | 1.24 $\pm$ 0.07  |
| Sorafenib                      | IC <sub>20</sub>                                           | 0.89 $\pm$ 0.03  | 0.90 $\pm$ 0.01  | 1.48 $\pm$ 0.05    | 1.09 $\pm$ 0.06  |
|                                | IC <sub>50</sub>                                           | 6.68 $\pm$ 0.03  | 11.58 $\pm$ 0.03 | 10.53 $\pm$ 0.04   | 12.69 $\pm$ 0.04 |
| IC <sub>50</sub> Potency ratio | Sorafenib IC <sub>50</sub> / Vevorisertib IC <sub>50</sub> | 21               | 20               | 30                 | 10               |

**Supplementary Table S1: IC<sub>20</sub> and IC<sub>50</sub> of Vevorisertib, Sorafenib and the IC<sub>50</sub> potency ratio.** Inhibitory concentrations IC<sub>20</sub> and IC<sub>50</sub> for Sorafenib and Vevorisertib, using Hep3B, HuH7, HepG2, PLC/PRF cell lines. Data are presented as mean  $\pm$  SD. IC<sub>50</sub> potency ratio between Sorafenib and Vevorisertib was calculated for Hep3B, HuH7, HepG2, PLC/PRF cell lines as Sorafenib IC<sub>50</sub>/ Vevorisertib IC<sub>50</sub>.

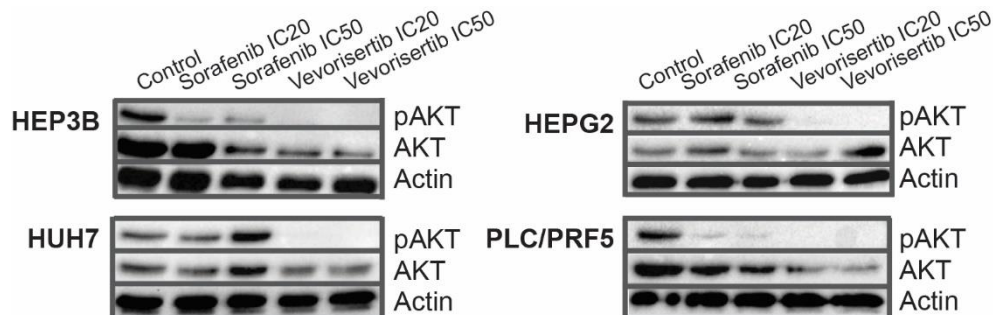

**Supplementary Figure S2: Effect of Vevorisertib treatment on phosphorylation of AKT.** Representative western blot analysis of pAKT, AKT and Actin using Hep3B, HuH7, HepG2, PLC/PRF cell lines.

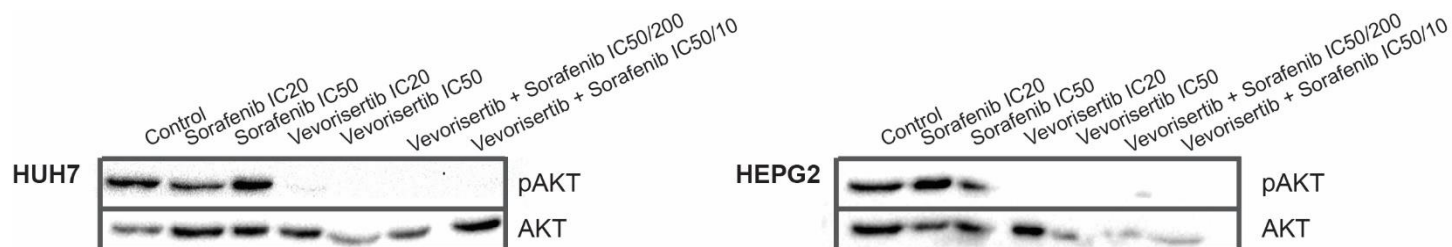

**Supplementary Figure S3: Effect of Veverisertib and Veverisertib + Sorafenib treatment on phosphorylation of AKT.**  
 Representative western blot analysis of pAKT and AKT using HuH7 and HepG2 cell lines.
